# Supplementary material for: Fall Treatment with Fumagillin Contributes to an Overwinter Shift in Vairimorpha Species Prevalence in Honey Bee Colonies in Western Canada
Source: MDPI journal article supplement (doi:10.3390/life14030373), 2024-03-12
Supplement: s1 [file s1]

Table S1 A, B, C. Friedman's repeated measures ANOVA statistical analysis for spore loads on different time points in control and fumagillin treatment group. (A) Mixed effects model, (B) pairwise comparison between treatments grouped by time points, (C) pairwise comparison between time points grouped by treatment.

A

| Effect                | DFn | DFd | F      | p      | p adjust | significant |
|-----------------------|-----|-----|--------|--------|----------|-------------|
| <b>Treatment</b>      | 1   | 208 | 7.854  | 0.0063 | 0.036    | *           |
| <b>Time</b>           | 3   | 208 | 41.114 | 0.0000 | 0.372    | *           |
| <b>Treatment:Time</b> | 3   | 208 | 2.247  | 0.084  | 0.031    |             |

B

| Time          | Group 1 | Group 2    | N1 | N2 | Statistics | Df | p adjust | significant |
|---------------|---------|------------|----|----|------------|----|----------|-------------|
| <b>21-Sep</b> | control | fumagillin | 27 | 27 | 0.794      | 26 | 0.434    | ns          |
| <b>8-Oct</b>  | control | fumagillin | 27 | 27 | 3.51       | 26 | 0.002    | **          |
| <b>23-Mar</b> | control | fumagillin | 27 | 27 | 1.53       | 26 | 0.139    | ns          |
| <b>19-May</b> | control | fumagillin | 27 | 27 | 1.99       | 26 | 0.057    | ns          |

C

| Treatment         | Group 1 | Group 2 | N1 | N2 | statistics | Df | p      | p adjust | significant |
|-------------------|---------|---------|----|----|------------|----|--------|----------|-------------|
| <b>Control</b>    | 19-May  | 21-Sep  | 27 | 27 | 5.103639   | 26 | 0.0000 | 0.0002   | ***         |
| <b>Control</b>    | 19-May  | 23-Mar  | 27 | 27 | 4.642979   | 26 | 0.0001 | 0.0005   | ***         |
| <b>Control</b>    | 19-May  | 8-Oct   | 27 | 27 | 5.152633   | 26 | 0.0000 | 0.0001   | ***         |
| <b>Control</b>    | 21-Sep  | 23-Mar  | 27 | 27 | -2.53181   | 26 | 0.0180 | 0.1060   | ns          |
| <b>Control</b>    | 21-Sep  | 8-Oct   | 27 | 27 | 0.059268   | 26 | 0.9530 | 1.0000   | ns          |
| <b>Control</b>    | 23-Mar  | 8-Oct   | 27 | 27 | 2.655083   | 26 | 0.0130 | 0.0800   | ns          |
| <b>Fumagillin</b> | 19-May  | 21-Sep  | 27 | 27 | 8.711635   | 26 | 0.0000 | 0.0000   | *****       |
| <b>Fumagillin</b> | 19-May  | 23-Mar  | 27 | 27 | 7.096466   | 26 | 0.0000 | 0.0000   | *****       |
| <b>Fumagillin</b> | 19-May  | 8-Oct   | 27 | 27 | 9.442285   | 26 | 0.0000 | 0.0000   | *****       |
| <b>Fumagillin</b> | 21-Sep  | 23-Mar  | 27 | 27 | -2.53548   | 26 | 0.0180 | 0.1060   | ns          |
| <b>Fumagillin</b> | 21-Sep  | 8-Oct   | 27 | 27 | 4.039412   | 26 | 0.0004 | 0.0030   | **          |
| <b>Fumagillin</b> | 23-Mar  | 8-Oct   | 27 | 27 | 4.24913    | 26 | 0.0002 | 0.0010   | **          |
